# Supplementary material for: Development and Validation of a Prognostic Model for Esophageal Adenocarcinoma Based on Necroptosis-Related Genes
Source: MDPI journal article supplement (doi:10.3390/genes13122243), 2022-11-29
Supplement: s1 [file s1]

Supplemental Table S1. Clinical and pathologic information of EAC patients.

| Variables      | Number | Constituent Ratio (%) |
|----------------|--------|-----------------------|
| Age (years)    |        |                       |
| ≤ 65           | 22     | 40.0                  |
| > 65           | 33     | 60.0                  |
| Gender         |        |                       |
| Male           | 47     | 85.5                  |
| Female         | 8      | 14.5                  |
| T              |        |                       |
| T1 / T2        | 26     | 47.3                  |
| T3 / T4        | 29     | 52.7                  |
| N              |        |                       |
| N <sub>0</sub> | 17     | 30.9                  |
| N <sub>+</sub> | 38     | 69.1                  |
| M              |        |                       |
| M <sub>0</sub> | 50     | 90.9                  |
| M <sub>1</sub> | 5      | 9.1                   |
| TNM staging    |        |                       |
| I / II         | 28     | 50.9                  |
| III / IV       | 27     | 49.1                  |
