# Supplementary material for: Development and Validation of a Prognostic Model for Esophageal Adenocarcinoma Based on Necroptosis-Related Genes
Source: MDPI journal article supplement (doi:10.3390/genes13122243), 2022-11-29
Supplement: s1 [file s1]

Supplemental Table S3. Chromosome and location of 17 DE-NRGs.

| Genes    | GRCh38.p14 |              | T2T-CHM13v2.0 |             |
|----------|------------|--------------|---------------|-------------|
|          | Chr        | Location     | Chr           | Location    |
| H2AC18   | 1          | NC_000001.11 | 1             | NC_060925.1 |
| TNFSF10  | 3          | NC_000003.12 | 3             | NC_060927.1 |
| HSP90AB1 | 6          | NC_000006.12 | 6             | NC_060930.1 |
| HMGB1    | 13         | NC_000013.11 | 13            | NC_060937.1 |
| CASP1    | 11         | NC_000011.10 | 11            | NC_060935.1 |
| H2AC8    | 6          | NC_000006.12 | 6             | NC_060930.1 |
| SLC25A4  | 4          | NC_000004.12 | 4             | NC_060928.1 |
| TRAF2    | 9          | NC_000009.12 | 9             | NC_060933.1 |
| H2AC20   | 1          | NC_000001.11 | 1             | NC_060925.1 |
| BID      | 22         | NC_000022.11 | 22            | NC_060946.1 |
| H2AC21   | 1          | NC_000001.11 | 1             | NC_060925.1 |
| MAPK10   | 4          | NC_000004.12 | 4             | NC_060928.1 |
| ZBP1     | 20         | NC_000020.11 | 20            | NC_060944.1 |
| TNFAIP3  | 6          | NC_000006.12 | 6             | NC_060930.1 |
| PPIA     | 7          | NC_000007.14 | 7             | NC_060931.1 |
| FADD     | 11         | NC_000011.10 | 11            | NC_060935.1 |
| JAK3     | 19         | NC_000019.10 | 19            | NC_060943.1 |
